# Supplementary material
Source: Springer Nature journal article supplement (https://www.springermedizin.de/resource/supplementary/12916_2009_212_MOESM6_ESM.pdf/9599404)

FIG 6

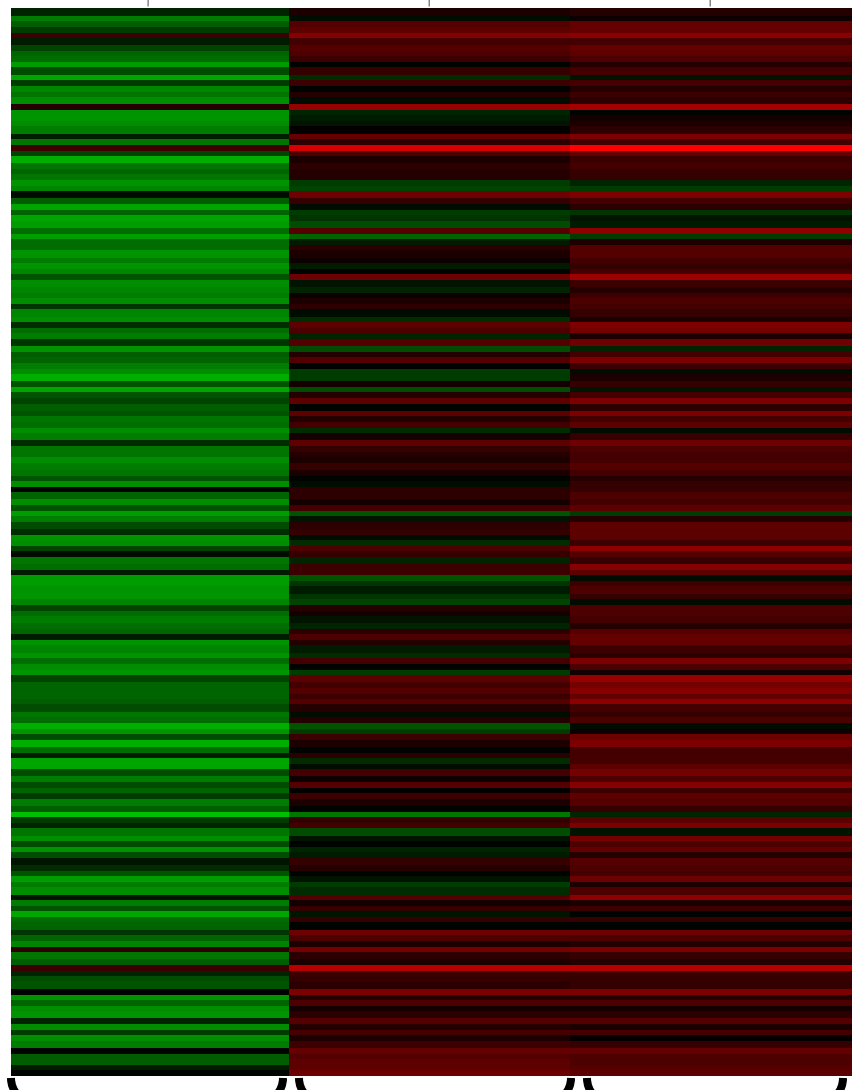

Expression

Subclass A

Subclass B

Subclass C

Supplement: MOESM6 [file 9599404]
